# Supplementary material
Source: PubMed Central journal article supplement (PMC3040474)
Supplement: 97320630005146S1.pdf [file 97320630005146S1.pdf]

### Supplementary materials:

**Table 1:** Physicochemical analysis and Major functional domains of HMGRs of *Artemisia annua*

| Protein | Theoretical pI | Theoretical Mw: | Family | Start -End | Bits   | E-value  |
|---------|----------------|-----------------|--------|------------|--------|----------|
| Q43318  | 6.52           | 60885.8         | HMGR   | 161-554    | 1006.8 | 7.8e-300 |
| Q43319  | 7.08           | 60328.3         | HMGR   | 155-548    | 1006.8 | 7.8e-300 |
| Q9SWQ3  | 8.28           | 61696.2         | HMGR   | 162-555    | 789.6  | 1.96-234 |
